# Supplementary material
Source: PubMed Central journal article supplement (PMC5740012)
Supplement: NIHMS916150-supplement-supplement_1.pdf [file NIHMS916150-supplement-supplement_1.pdf]

**Supplemental Figure 1:** Receiver operating characteristic curve for ISI.

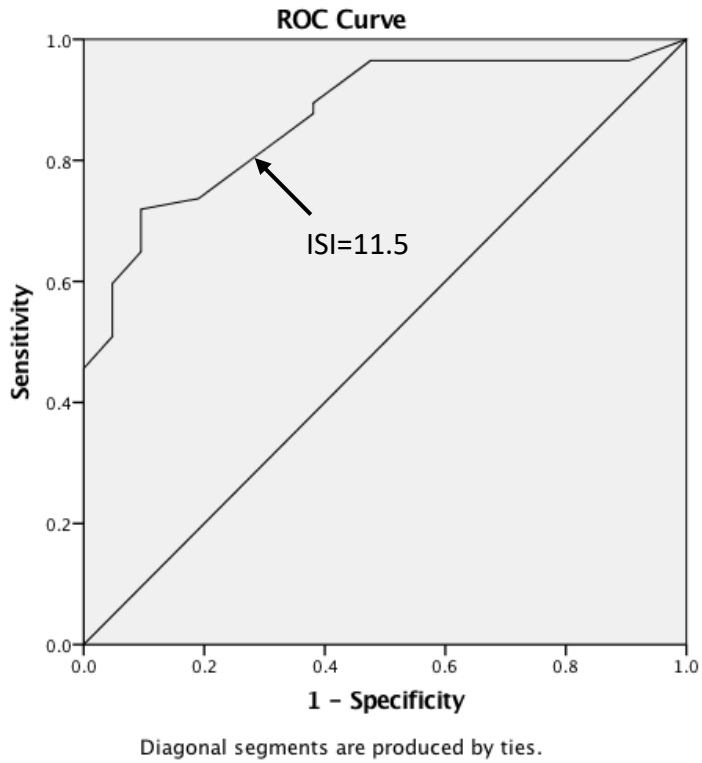

**Note:** PSQI score of >8 indicates clinically relevant sleep impairment or poor sleep quality.
